# Supplementary material for: Characterization of Conyza bonariensis Allelochemicals against Broomrape Weeds
Source: Molecules. 2022 Nov 1;27(21):7421. doi: 10.3390/molecules27217421 (PMC9654463; doi:10.3390/molecules27217421)
Supplement: Supplementary file 1 [file molecules-27-07421-s001.zip › molecules-1979307-supplementary.pdf]

# Supporting Information

## Characterization of *Conyza bonariensis* allelochemicals against broomrape weeds

Antonio Cala Peralta<sup>1,2</sup>, Gabriele Soriano<sup>2</sup>, Jesús G. Zorrilla<sup>1,2</sup>, Marco Masi<sup>2,\*</sup>, Alessio Cimmino<sup>2</sup>, Mónica Fernández-Aparicio<sup>3,\*</sup>

<sup>1</sup> Department of Chemical Sciences, University of Naples Federico II, Complesso Universitario Monte S. Angelo, Via Cintia 4, 80126 Naples, Italy; antonio.cala@uca.es (A.C.P.); gabriele.soriano@unina.it (G.S.); jesus.garcia@uca.es (J.G.Z.); alessio.cimmino@unina.it (A.C.)

<sup>2</sup> Allelopathy Group, Department of Organic Chemistry, Facultad de Ciencias, Institute of Biomolecules (INBIO), University of Cadiz, C/Avenida República Saharaui, s/n, 11510 Puerto Real, Spain

<sup>3</sup> Department of Plant Breeding, Institute for Sustainable Agriculture (IAS), CSIC, Avenida Menéndez Pidal s/n, 14004 Córdoba, Spain

\* Correspondence: marco.masi@unina.it (M.M.); monica.fernandez@ias.csic.es (M.F.-A.)

### Supporting Information list

**Figure S1.** <sup>1</sup>H-NMR spectrum of (4Z)-lachnophyllum methyl ester (**1**) recorded in CDCl<sub>3</sub> at 500 MHz.

**Figure S2.** ESI MS spectrum of (4Z)-lachnophyllum methyl ester (**1**) recorded in positive modality.

**Figure S3.** <sup>1</sup>H-NMR spectrum of (4Z)-lachnophyllum lactone (**2**) recorded in CDCl<sub>3</sub> at 500 MHz.

**Figure S4.** ESI MS spectrum of (4Z)-lachnophyllum lactone (**2**) recorded in positive modality.

**Figure S5.** <sup>1</sup>H-NMR spectrum of (4Z,8Z)-matricaria lactone (**3**) recorded in CDCl<sub>3</sub> at 500 MHz.

**Figure S6.** ESI MS spectrum of (4Z,8Z)-matricaria lactone (**3**) recorded in positive modality.

**Figure S7.** <sup>1</sup>H-NMR spectrum of (4E,8Z)-matricaria lactone (**4**) recorded in CDCl<sub>3</sub> at 500 MHz.

**Figure S8.** ESI MS spectrum of (4E,8Z)-matricaria lactone (**4**) recorded in positive modality.

**Figure S9.** <sup>1</sup>H-NMR spectrum of methyl 4-hydroxy-3-methoxybenzoate (**5**) recorded in CDCl<sub>3</sub> at 500 MHz.

**Figure S10.** ESI MS spectrum of methyl 4-hydroxy-3-methoxybenzoate (**5**) recorded in positive modality.

**Figure S11.** <sup>1</sup>H-NMR spectrum of methyl 4-hydroxybenzoate (**6**) recorded in CDCl<sub>3</sub> at 500 MHz.

**Figure S12.** ESI MS spectrum of methyl 4-hydroxybenzoate (**6**) recorded in positive modality.

**Figure S13.** <sup>1</sup>H-NMR spectrum of hispidulin (**7**) recorded in CDCl<sub>3</sub> at 500 MHz.

**Figure S14.** <sup>13</sup>C-NMR spectrum of hispidulin (**7**) recorded in (CD<sub>3</sub>)<sub>2</sub>CO at 125 MHz.

**Figure S15.** ESI MS spectrum of hispidulin (**7**) recorded in positive modality.

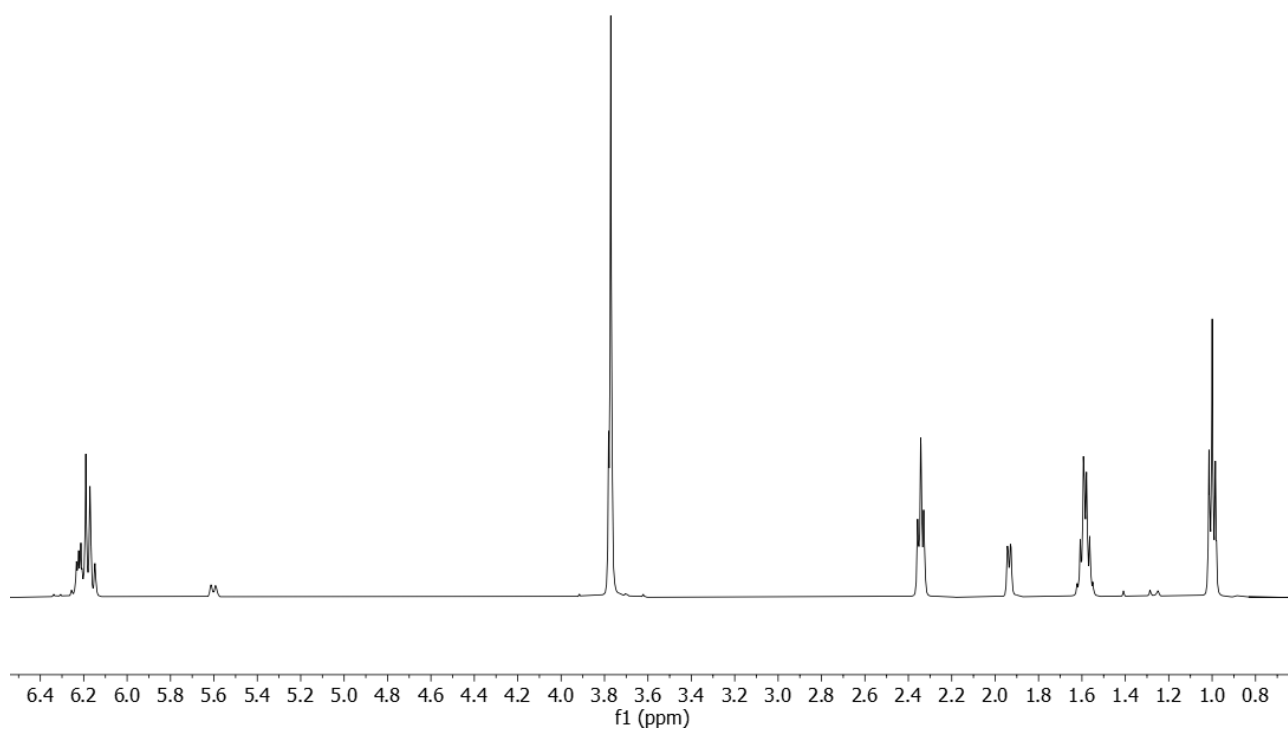

**Figure S1.**  $^1\text{H}$ -NMR spectrum of (4Z)-lachnophyllum methyl ester (**1**) recorded in  $\text{CDCl}_3$  at 500 MHz.

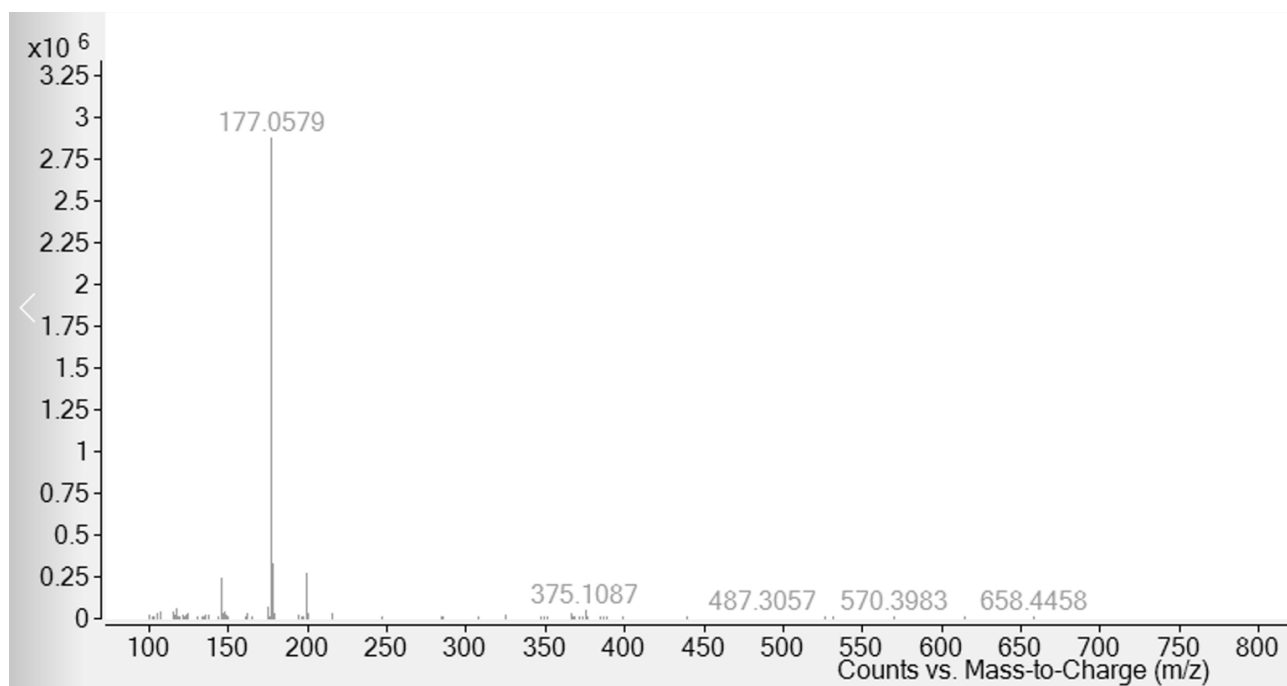

**Figure S2.** ESI MS spectrum of (4Z)-lachnophyllum methyl ester (**1**) recorded in positive modality.

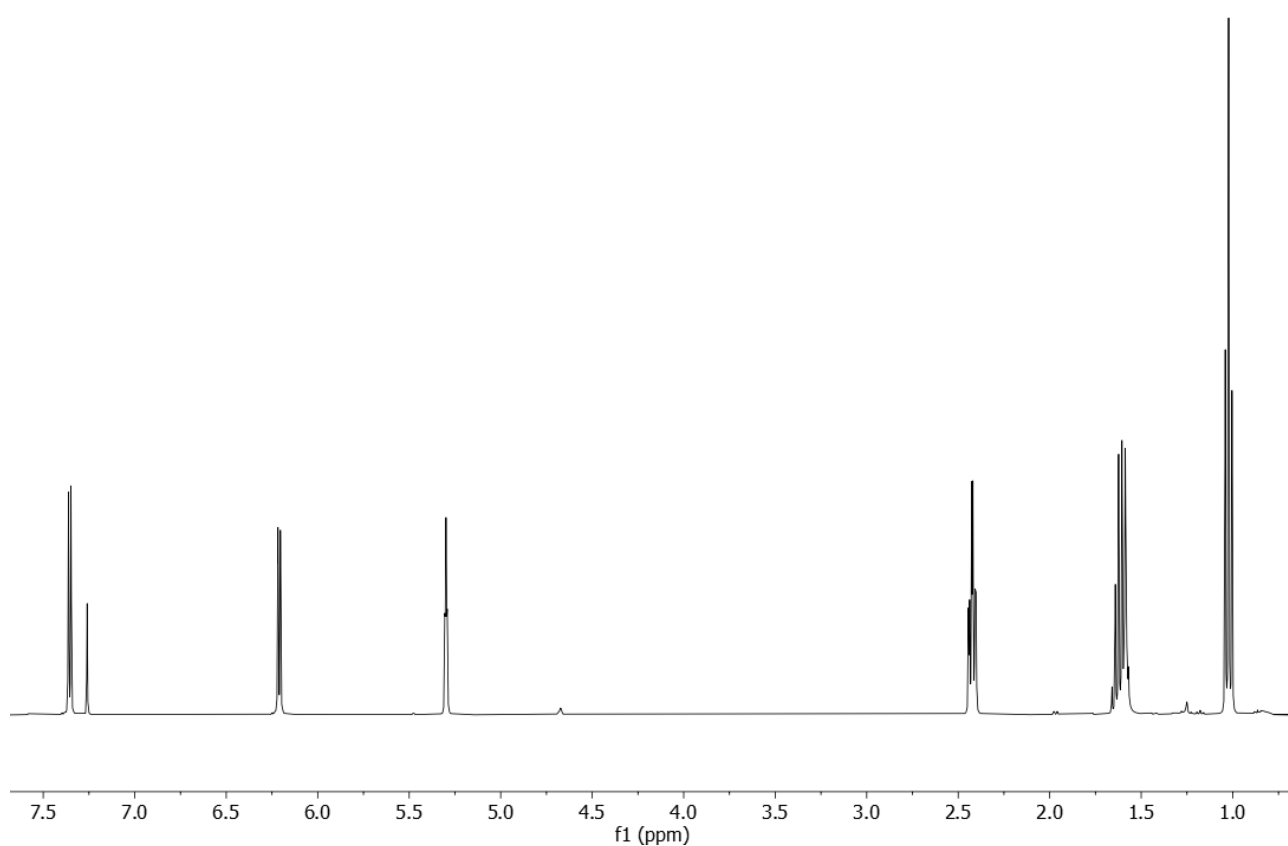

**Figure S3.** <sup>1</sup>H-NMR spectrum of (4Z)-lachnophyllum lactone (**2**) recorded in CDCl<sub>3</sub> at 500 MHz.

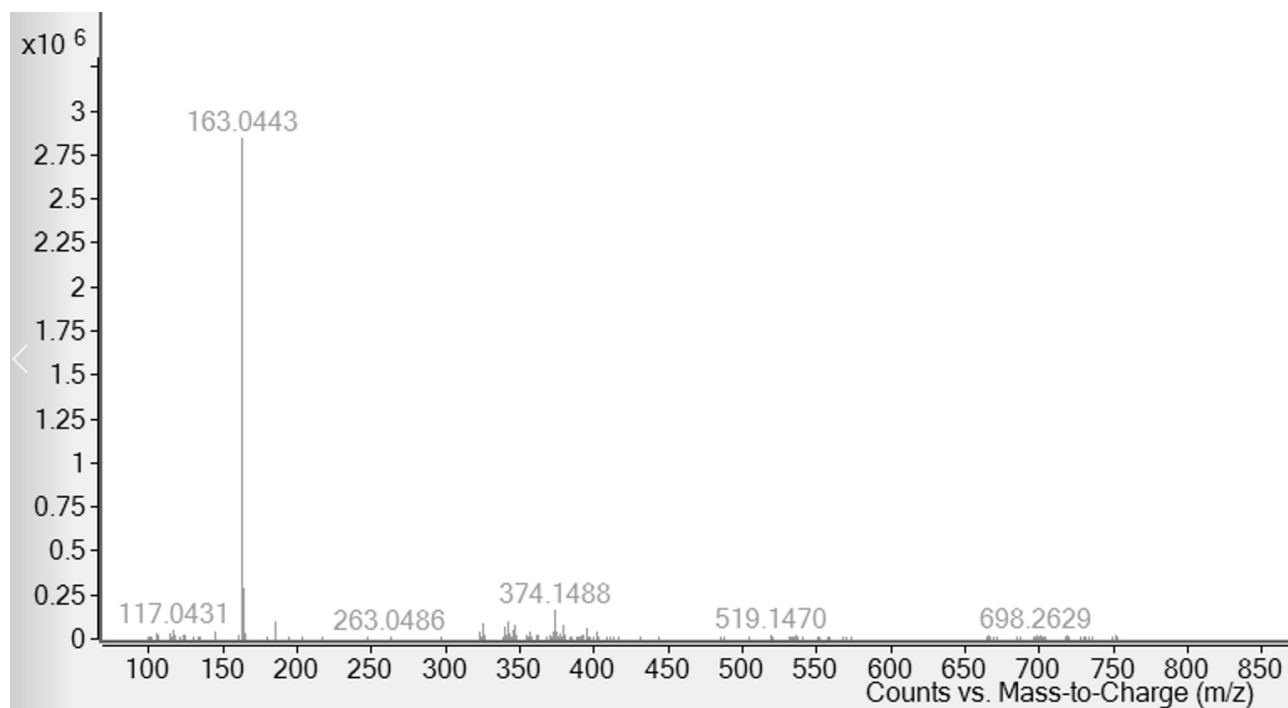

**Figure S4.** ESI MS spectrum of (4Z)-lachnophyllum lactone (**2**) recorded in positive modality.

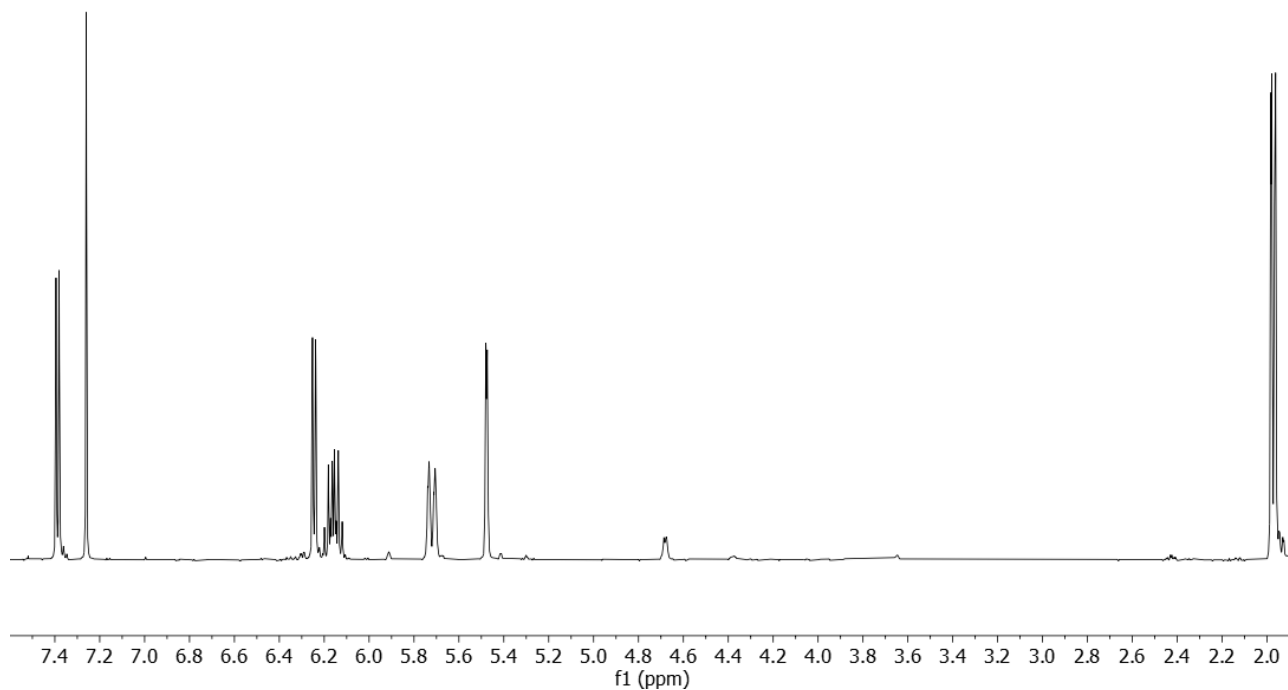

**Figure S5.**  $^1\text{H}$ -NMR spectrum of (4Z,8Z)-matricaria lactone (**3**) recorded in  $\text{CDCl}_3$  at 500 MHz.

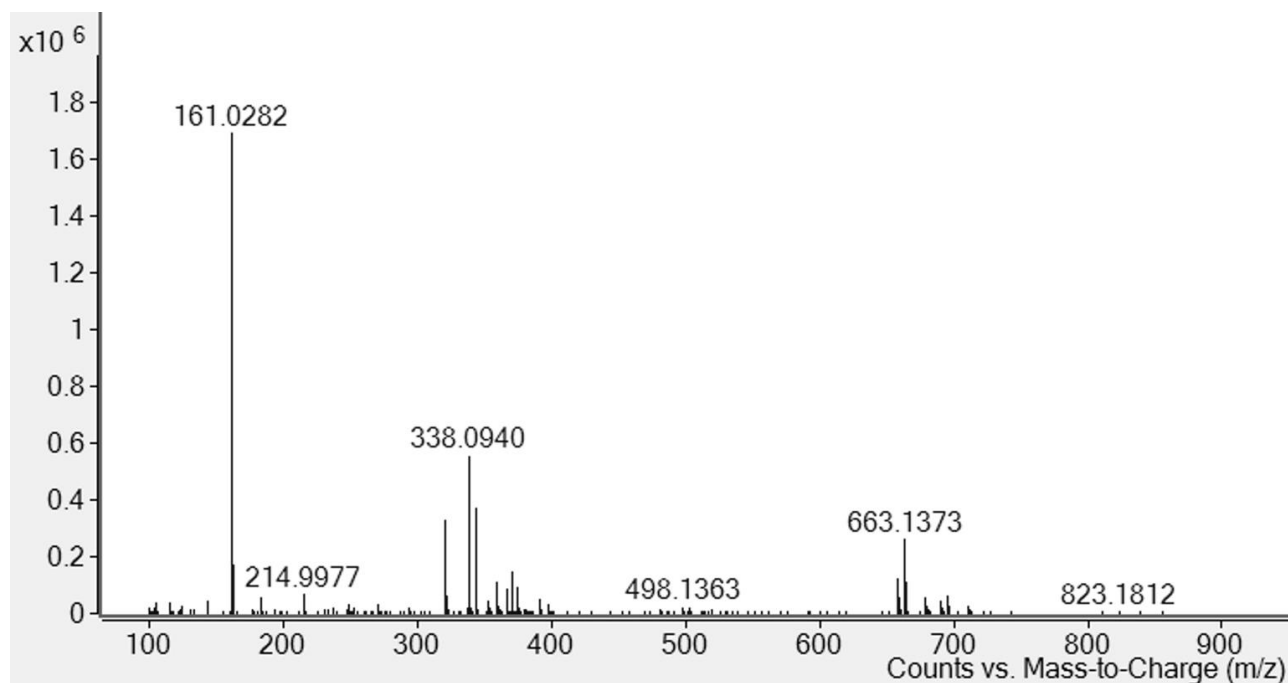

**Figure S6.** ESI MS spectrum of (4Z,8Z)-matricaria lactone (**3**) recorded in positive modality.

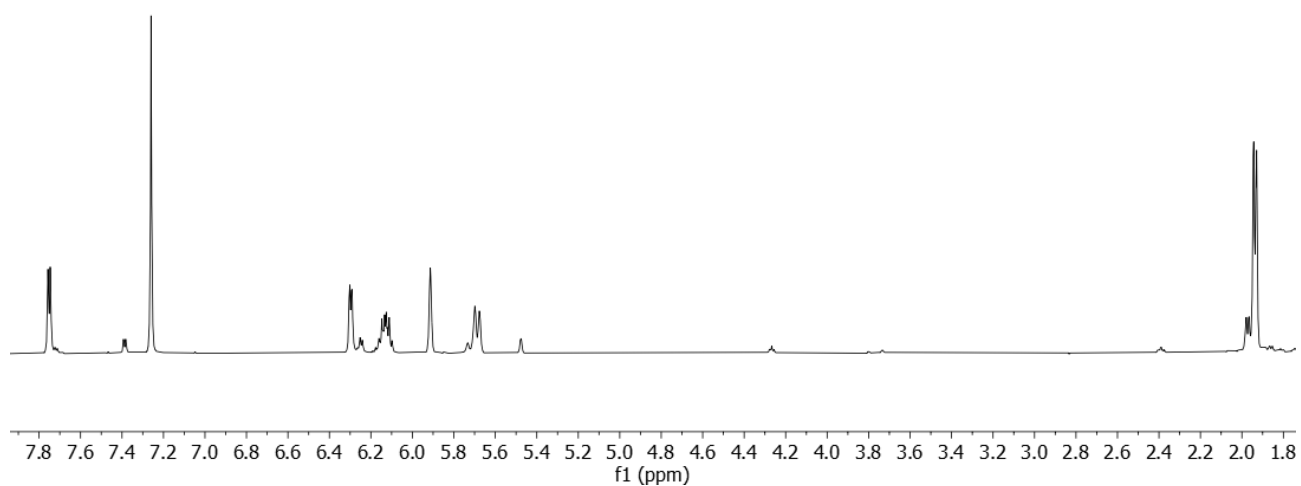

**Figure S7.** <sup>1</sup>H-NMR spectrum of (4*E*,8*Z*)-matricaria lactone (**4**) recorded in CDCl<sub>3</sub> at 500 MHz.

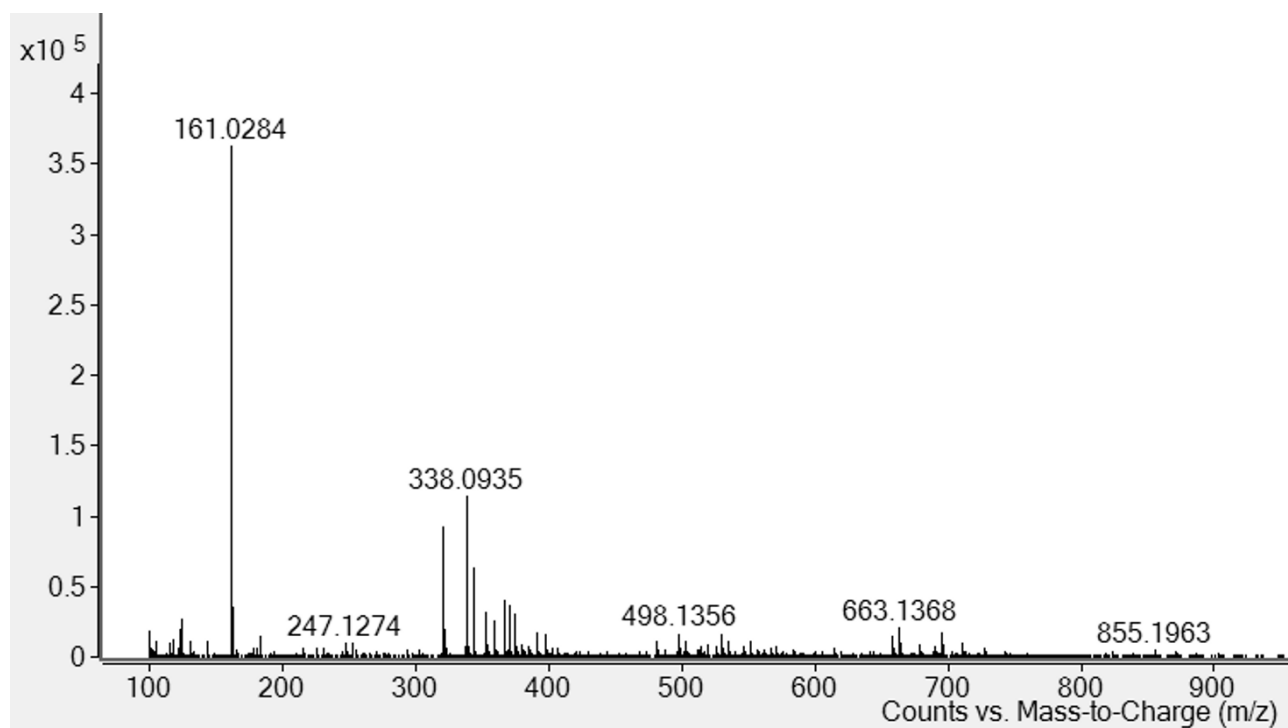

**Figure 8.** ESI MS spectrum of (4*E*, 8*Z*)-matricaria lactone (**4**) recorded in positive modality.

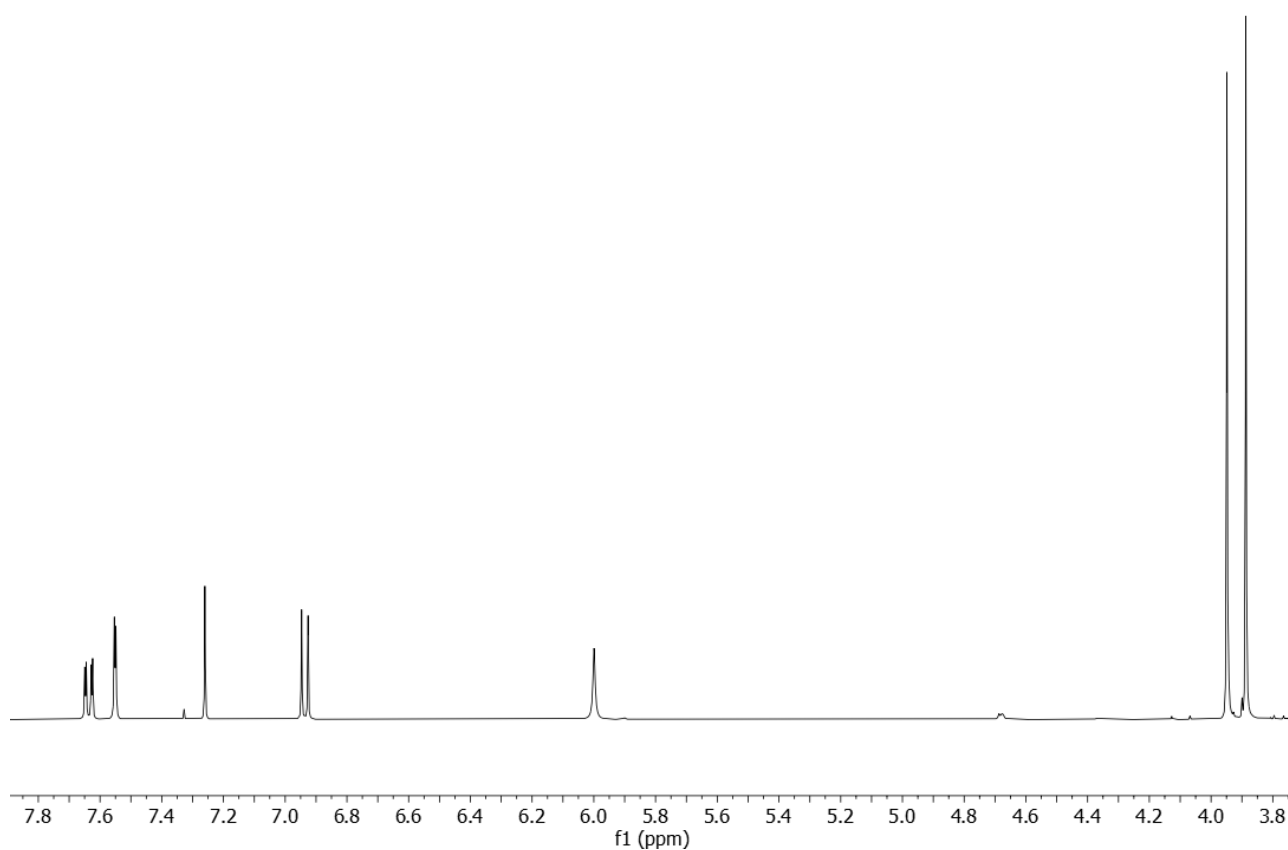

**Figure S9.** <sup>1</sup>H-NMR spectrum of methyl 4-hydroxy-3-methoxybenzoate (**5**) recorded in CDCl<sub>3</sub> at 500 MHz.

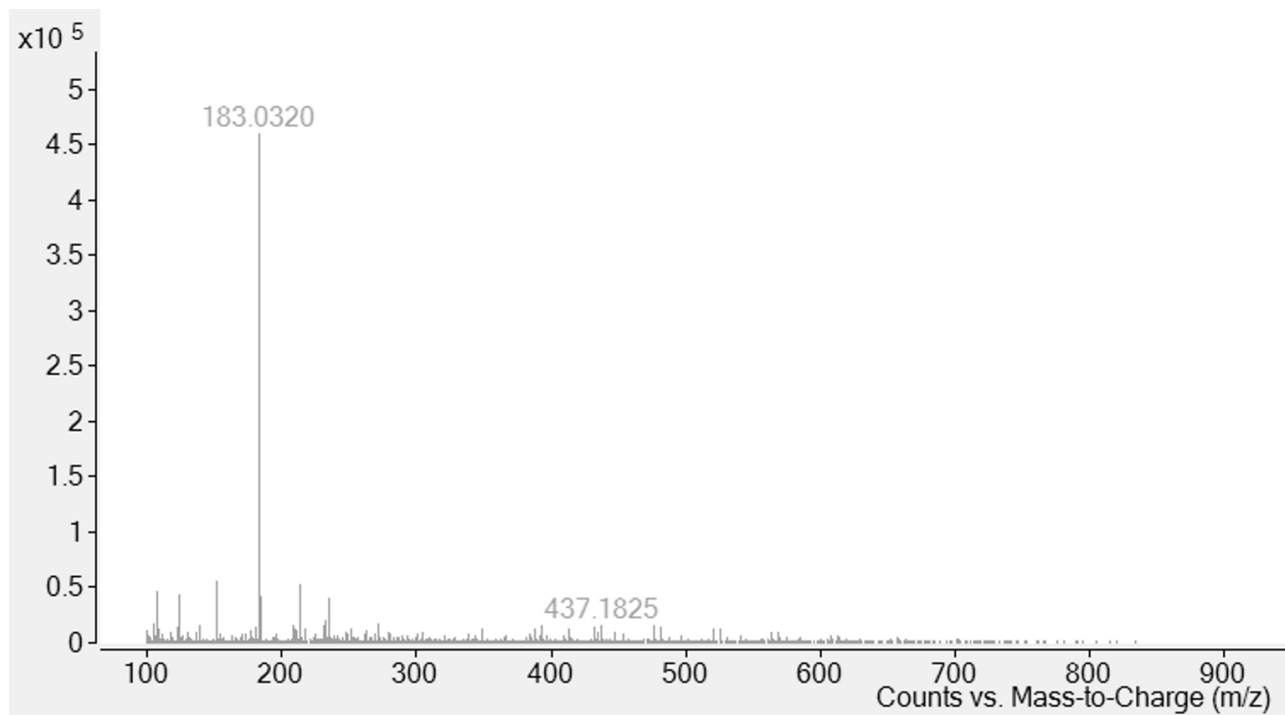

**Figure S10.** ESI MS spectrum of methyl 4-hydroxy-3-methoxybenzoate (**5**) recorded in positive modality.

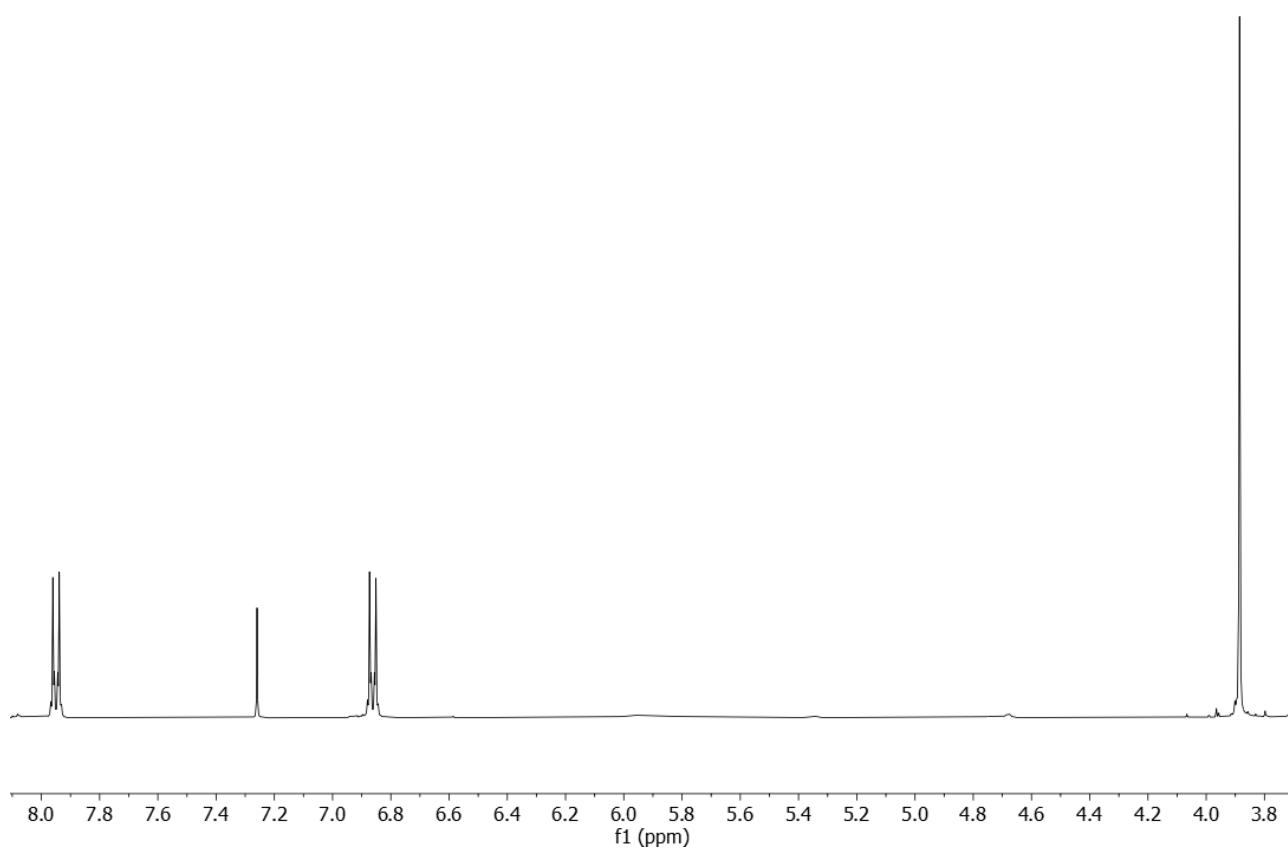

**Figure S11.**  $^1\text{H}$ -NMR spectrum of methyl 4-hydroxybenzoate (6) recorded in  $\text{CDCl}_3$  at 500 MHz.

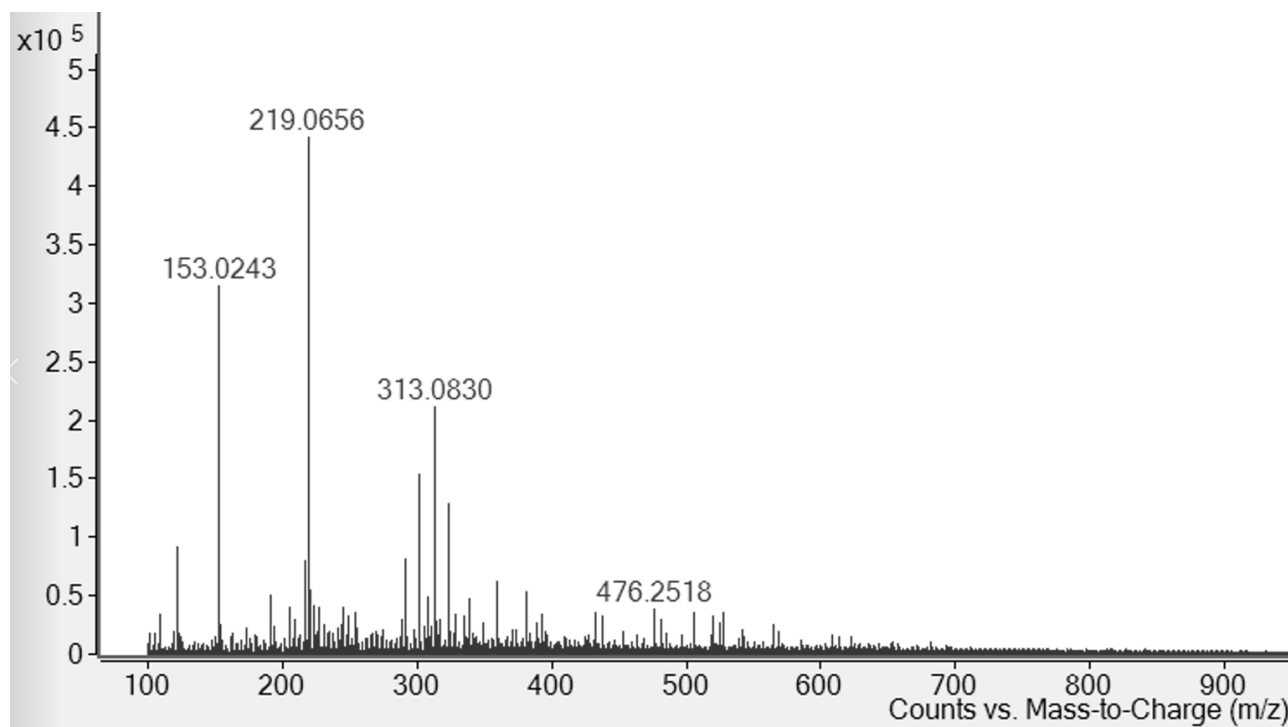

**Figure S12.** ESI MS spectrum of methyl 4-hydroxybenzoate (6) recorded in positive modality.

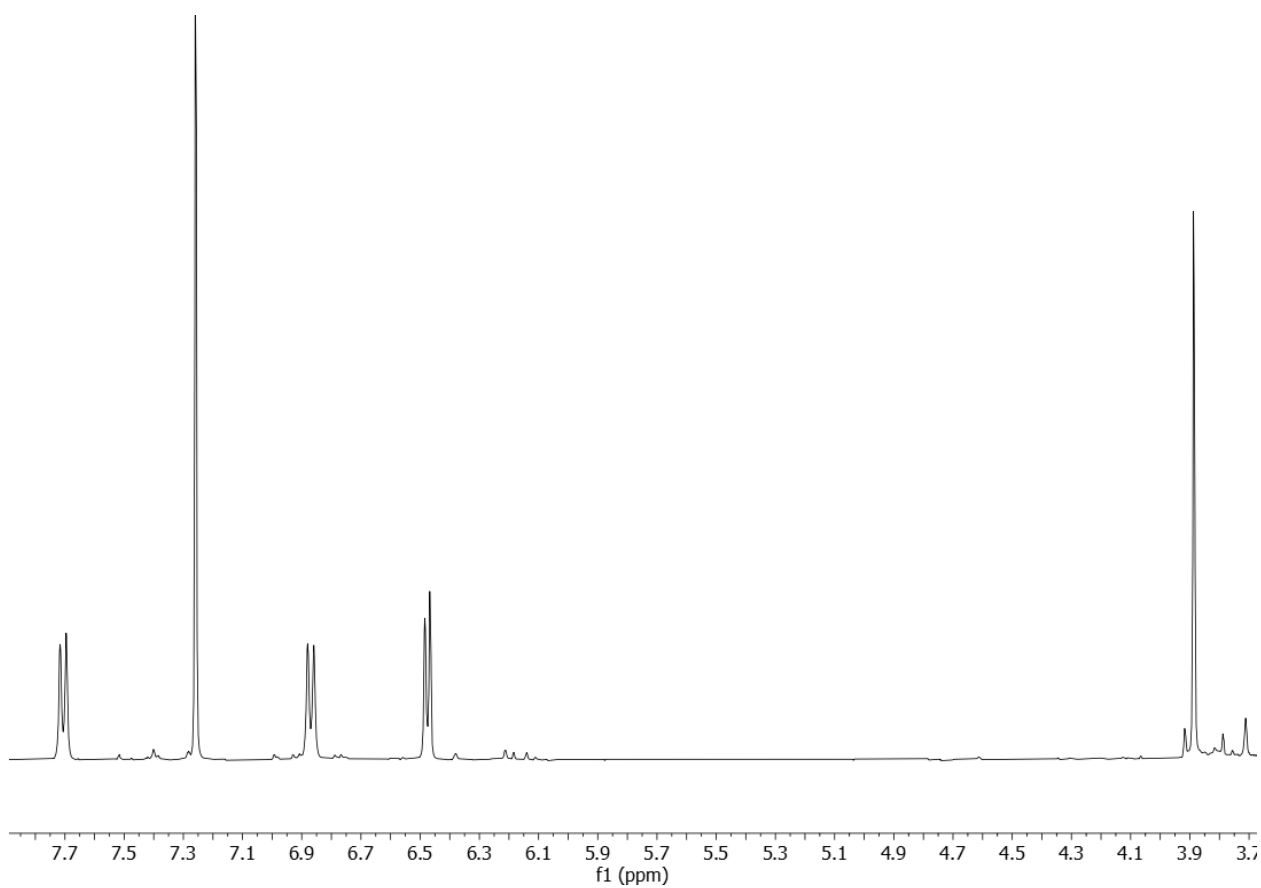

**Figure S13.** <sup>1</sup>H-NMR spectrum of hispidulin (**7**) recorded in CDCl<sub>3</sub> at 500 MHz.

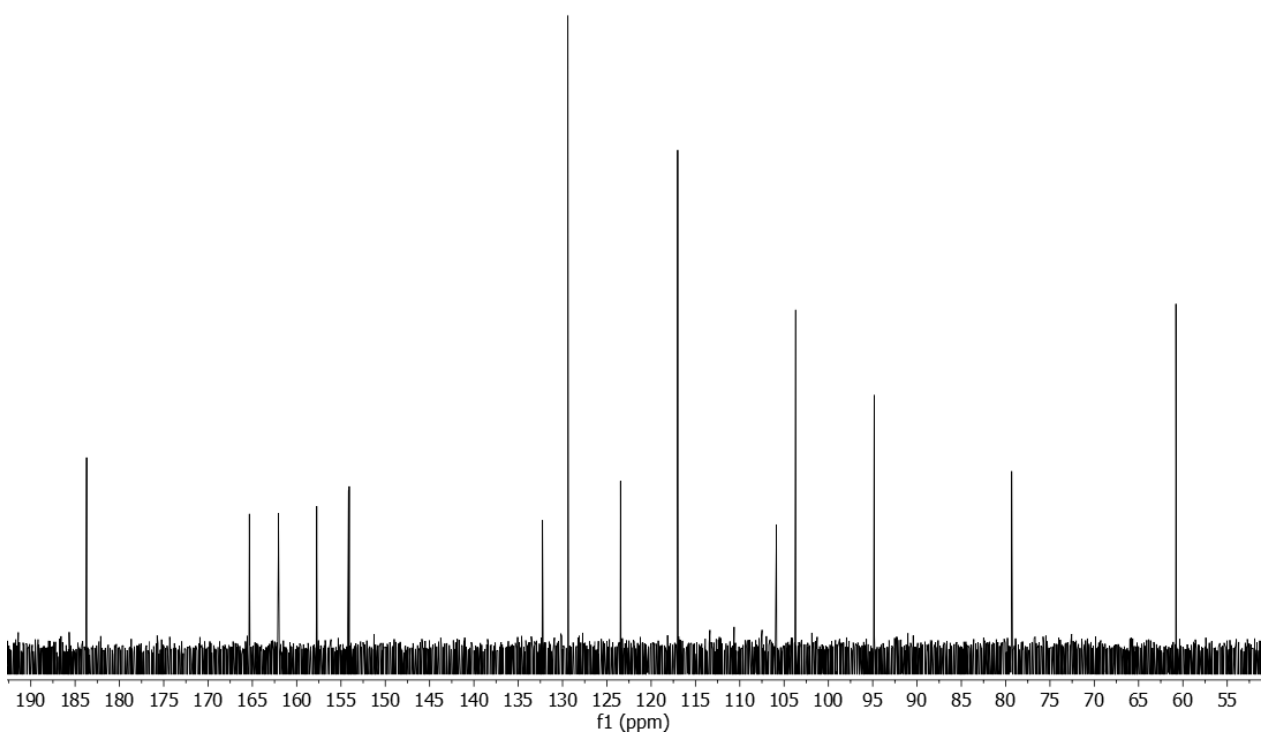

**Figure S14.** <sup>13</sup>C-NMR spectrum of hispidulin (**7**) recorded in (CD<sub>3</sub>)<sub>2</sub>CO at 125 MHz.

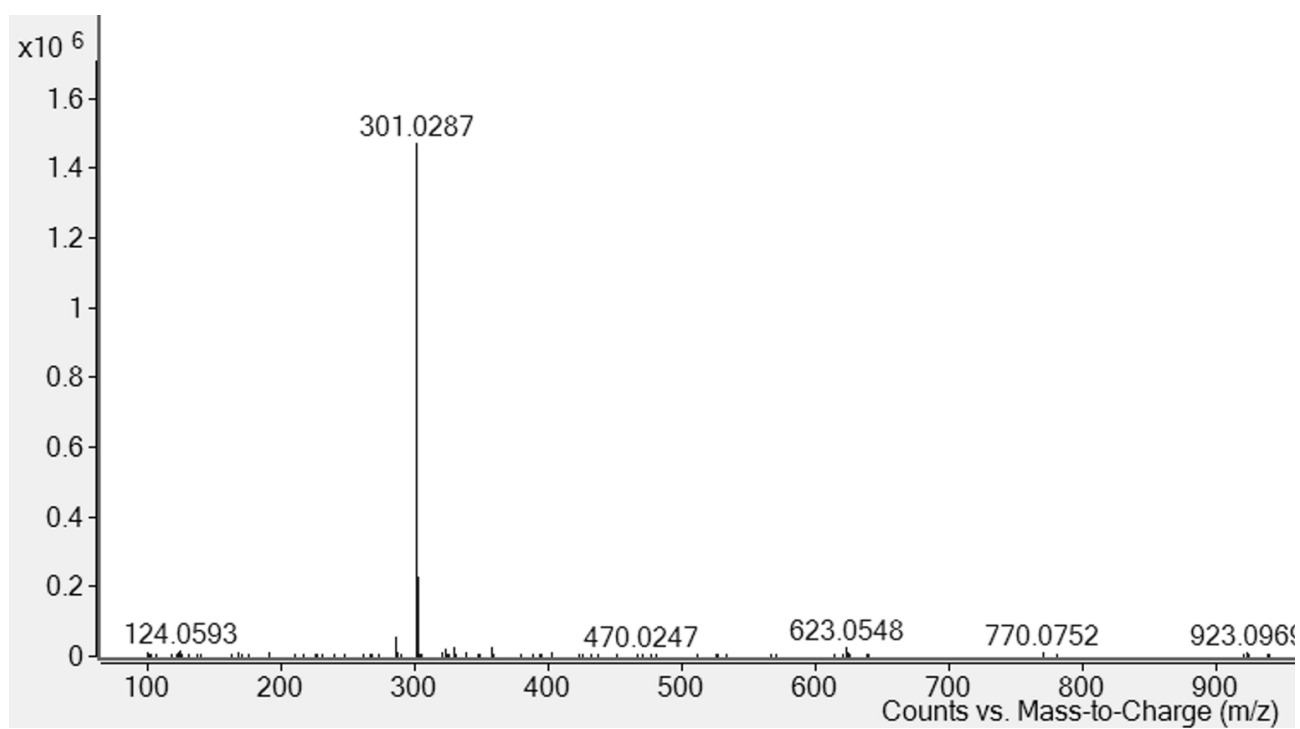

**Figure S15.** ESI MS spectrum of hispidulin (7) recorded in positive modality.
